# Supplementary material
Source: bioRxiv or medRxiv preprint supplement (https://www.biorxiv.org/highwire/filestream/84346/field_highwire_adjunct_files/0/274530-1.pdf)
Supplement: Supplementary file [file 274530-1.pdf]

Supplementary Figure 1

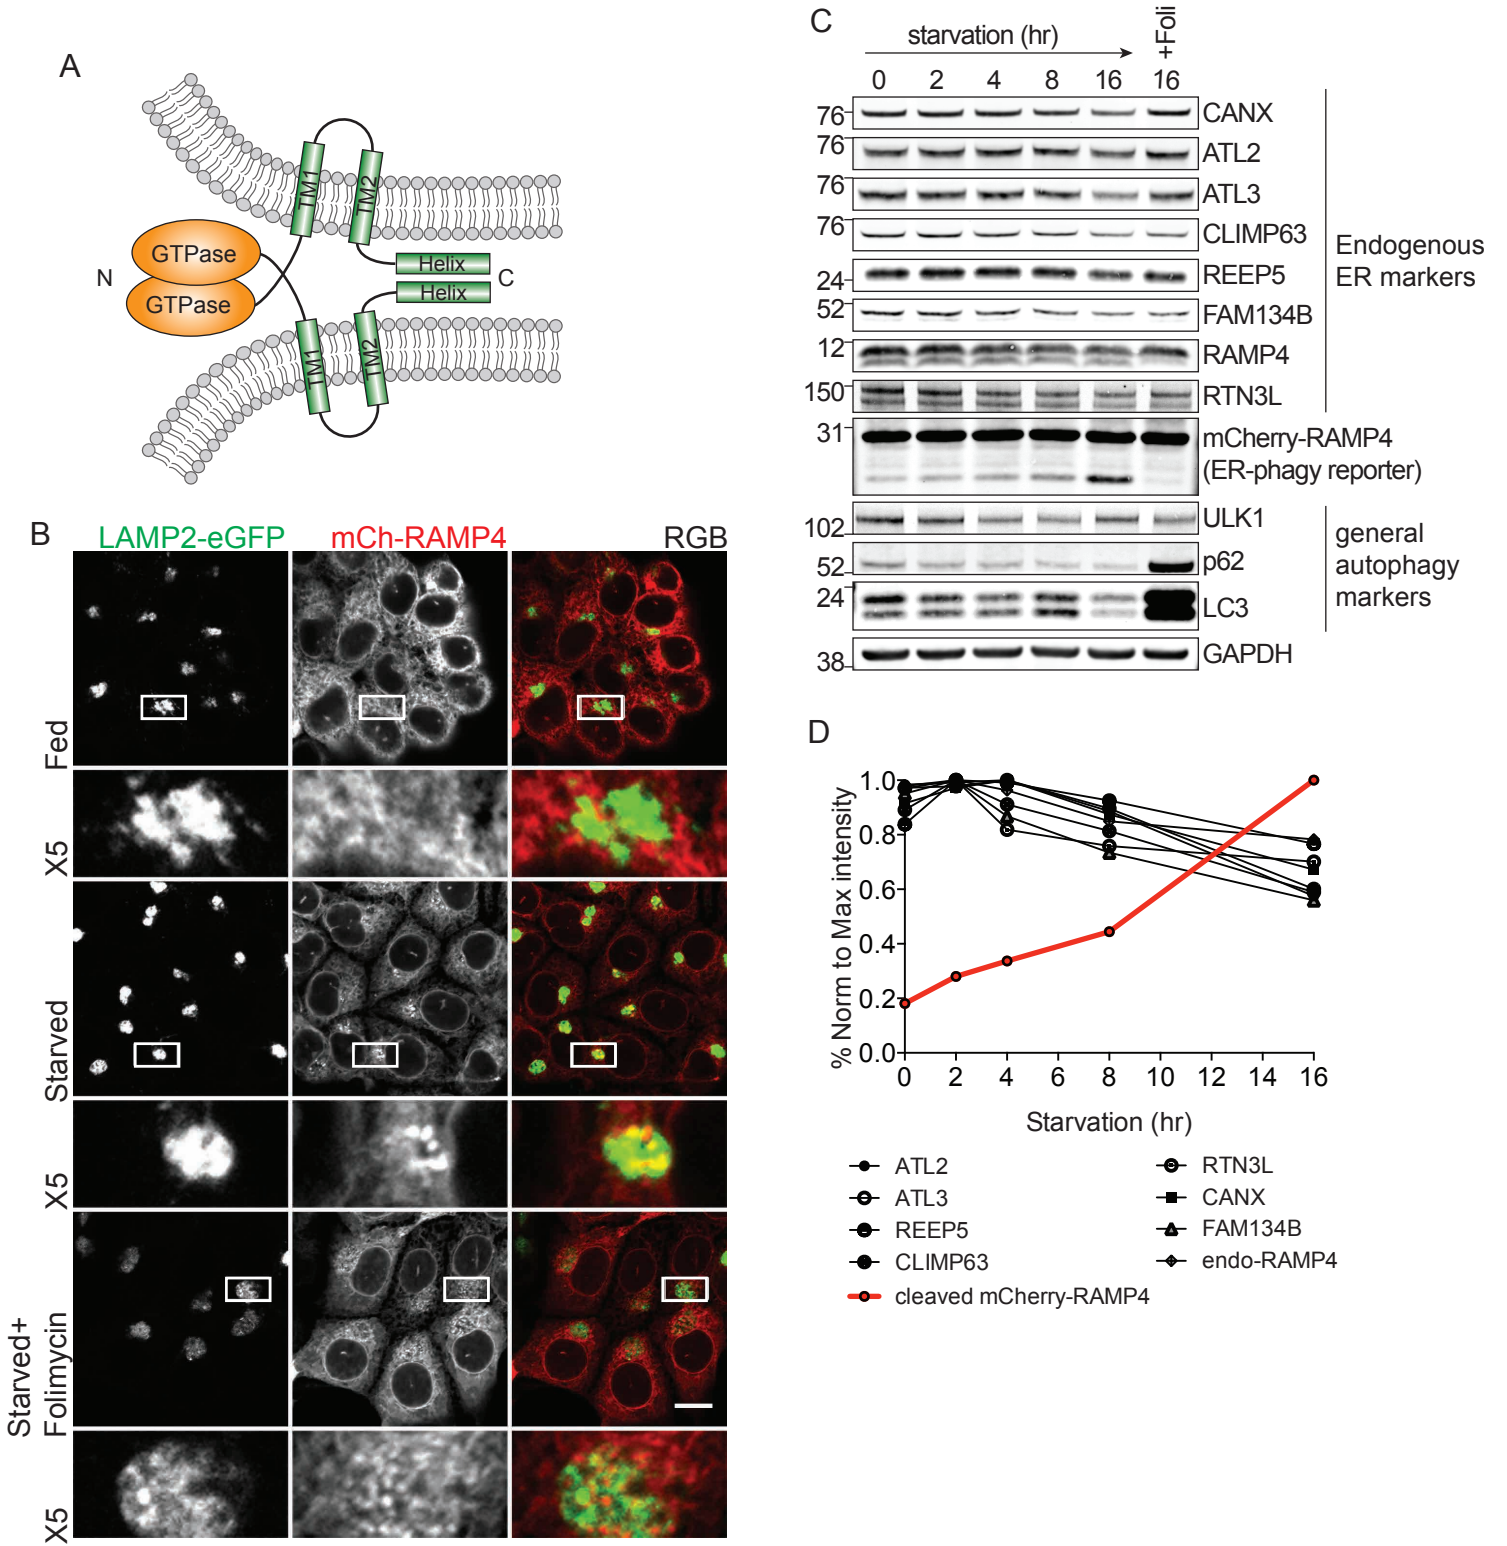

Supplementary Figure 2

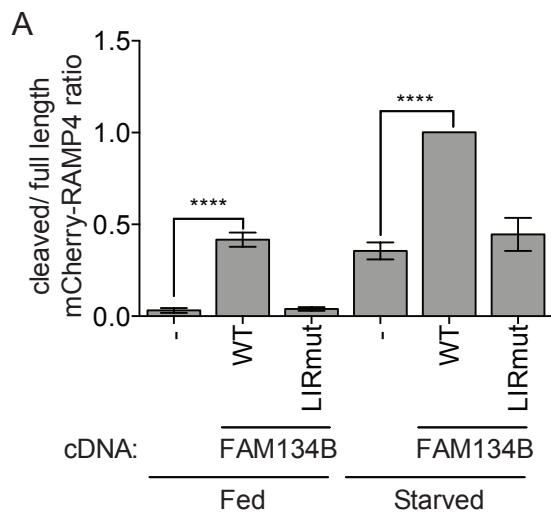

Supplementary Figure 3

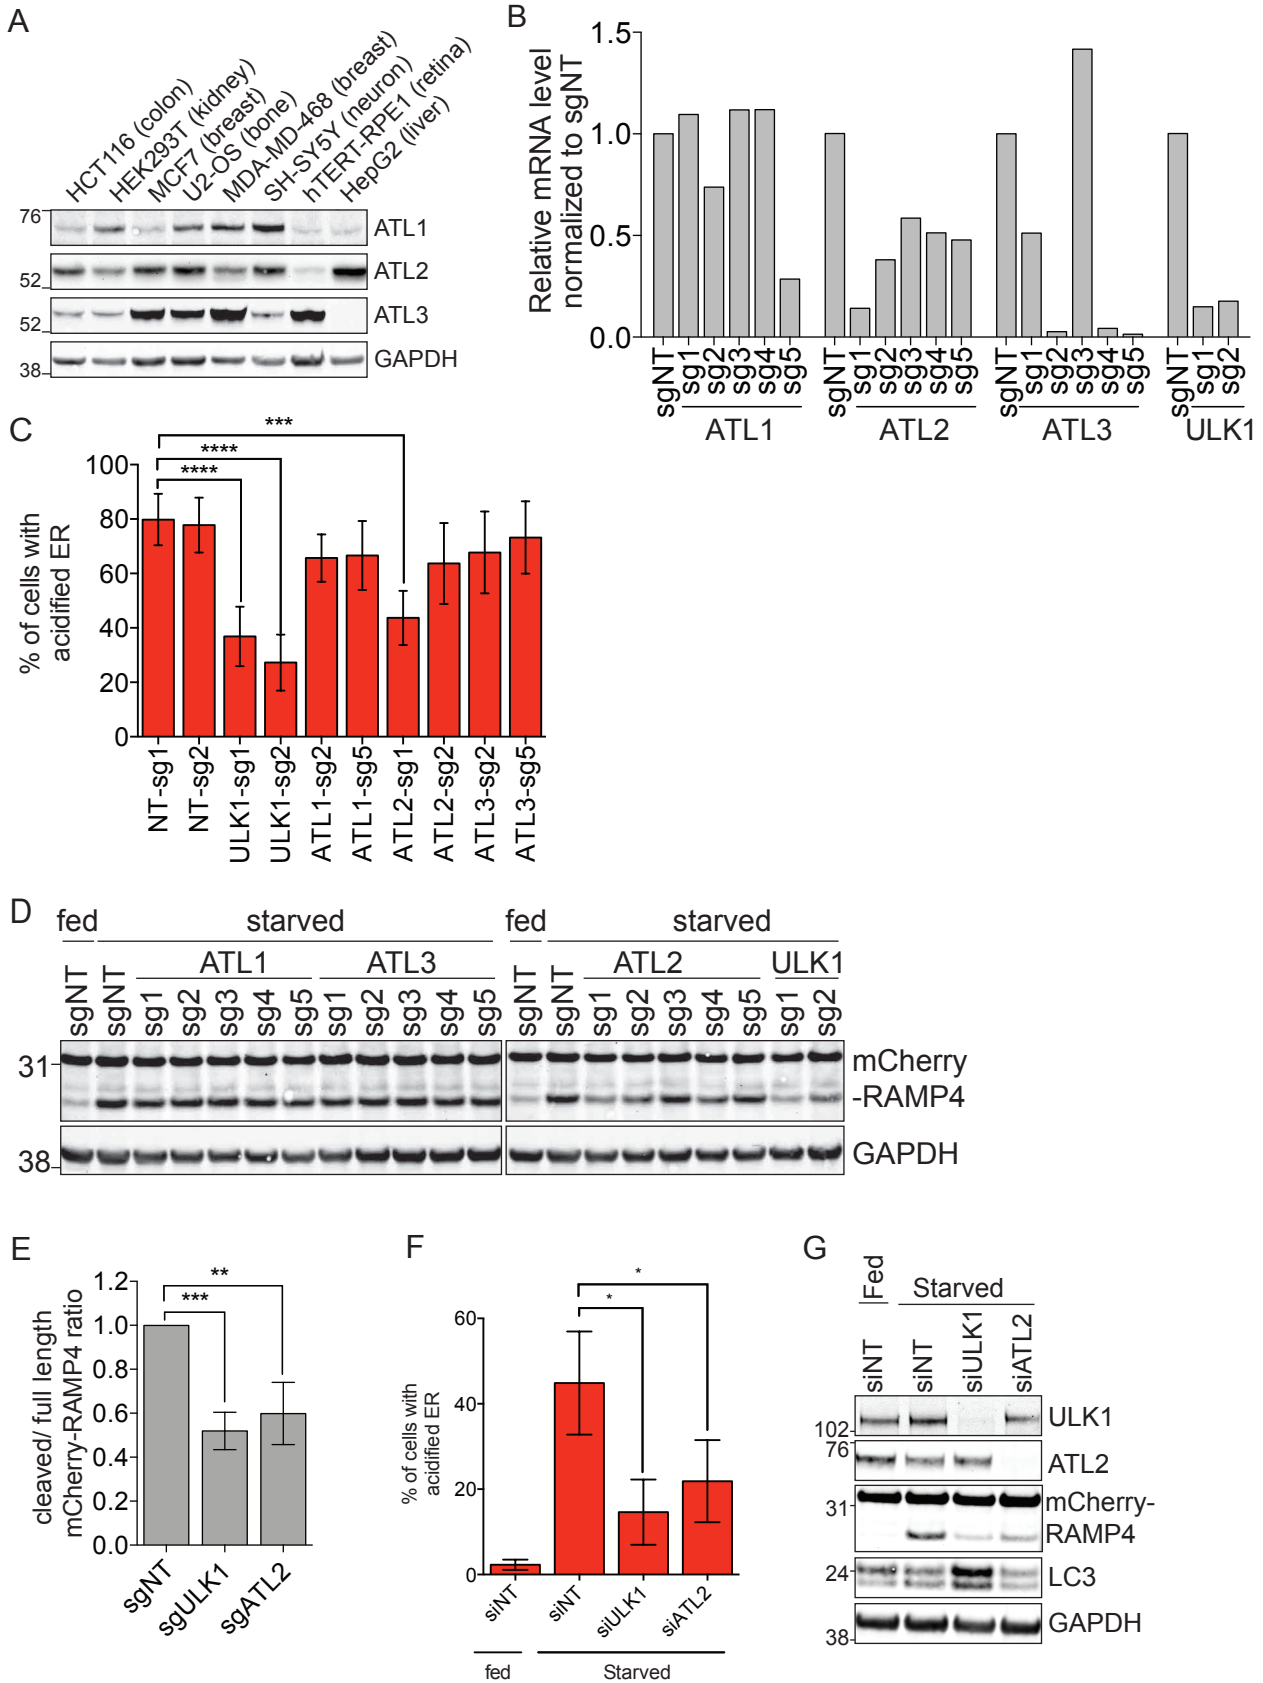



Supplementary Figure 5

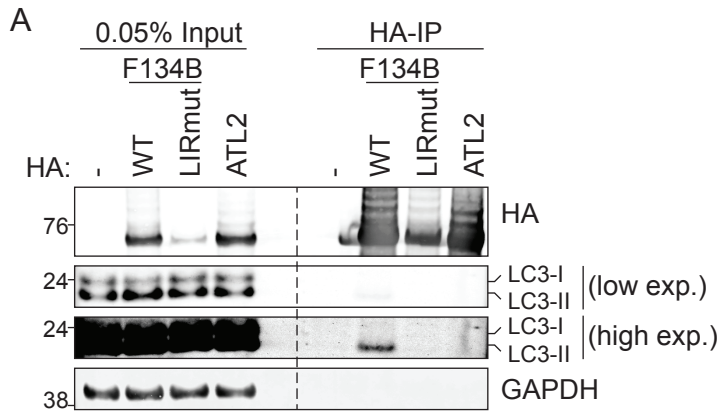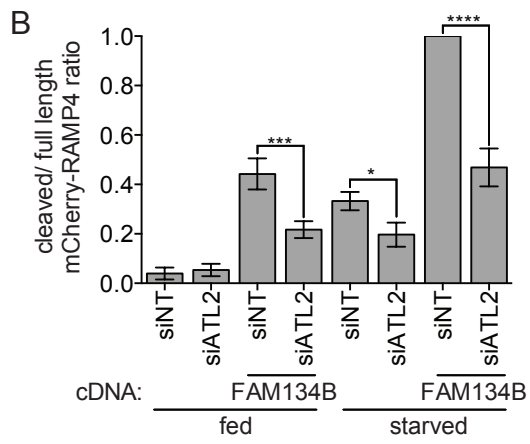

Supplementary Figure 6

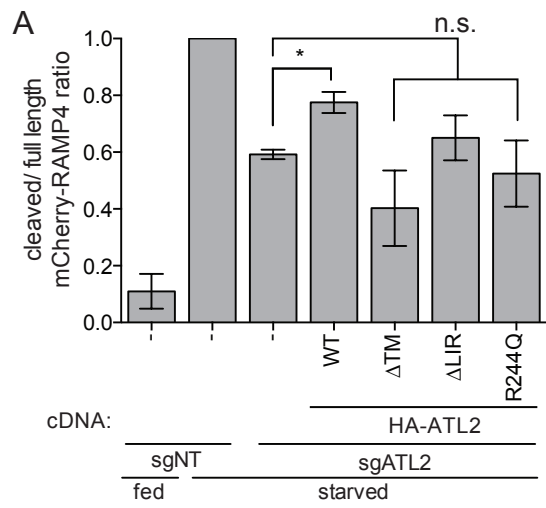

**Supp Table 1: sgRNAs Targeting Transcription Start Site for CRISPRi**

| sgRNAs targeting TSS                   | Protospacer            | Forward Primer                    | Reverse Primer                            | Vector backbone |
|----------------------------------------|------------------------|-----------------------------------|-------------------------------------------|-----------------|
| <b>pLG1-puro Non-targeting sgRNA 1</b> | GCGCCAAACGTGCCCTGACGG  | TTGGGCGCCAAACGTGCCCTGACGGTTAAGAGC | TTAGCTCTTAAACCCGTCAGGGCAGCTTTGGCGCCAACAAG | pLG1-Puro       |
| pLG1-puro Non-targeting sgRNA 3        | GGCTCGGTCCC CGCTCGTCCG | TTGGGGCTCGGTCCC CGCTCGTCTTAAGAGC  | TTAGCTCTTAAACCGACGACGCGGGACCGAGCCCAACAAG  | pLG1-Puro       |
| <b>pLG1-puro-sgULK1-1</b>              | GCGCGCGGCACAGAGACCGT   | TTGGGCGCGGCACAGAGACCGTGTTAAGAGC   | TTAGCTCTTAAACACGGTCTCTGTGCCGCCCAACAAG     | pLG1-Puro       |
| pLG1-puro-sgULK1-2                     | GCCGACTCCGGCTCCAATA    | TTGGCCGACTCCGGCTCCAAC TAGTTAAGAGC | TTAGCTCTTAAACTAGTTGGAGCCGGAGTCGGCCAACAAG  | pLG1-Puro       |
| pLG1-puro-sgATL1-1                     | GCAACCTGCGGCCCGGAGA    | TTGGCAACCTGCGGCCCGGAGAGTTTAAGAGC  | TTAGCTCTTAAACTCTCCGGGGCCGAGGTTGCCAACAAG   | pLG1-Puro       |
| pLG1-puro-sgATL1-2                     | GCGCTCGCTGCCTTCTCCG    | TTGGGCGCTCGCTGCCTTCTCCGTTTAAGAGC  | TTAGCTCTTAAACCGGAGAAGGCAGCGAGCGCCAACAAG   | pLG1-Puro       |
| pLG1-puro-sgATL1-3                     | GGGAACCCACAAGTCCCCGG   | TTGGGAACCCACAAGTCCCCGGTTTAAGAGC   | TTAGCTCTTAAACCGGGGACTTGTGGTTCCCCAACAAG    | pLG1-Puro       |
| pLG1-puro-sgATL1-4                     | GCGGGCCG CAGGTTGCTGG   | TTGGCGGGCCG CAGGTTGCTGGTTTAAGAGC  | TTAGCTCTTAAACCCAGCAACCTGCGGCCCGCAACAAG    | pLG1-Puro       |
| pLG1-puro-sgATL1-5                     | GTCCTCCAACCGATCGCTA    | TTGGTCTCCAACCGATCGCTAGTTTAAGAGC   | TTAGCTCTTAAACTAGCGATCGGTTGGGAGGACCAACAAG  | pLG1-Puro       |
| <b>pLG1-puro-sgATL2-1</b>              | GAGGGCAGCAACCGCACCAG   | TTGGAGGGCAGCAACCGCACCAGTTTAAGAGC  | TTAGCTCTTAAACTGGTGCGGTTGCTGCCCTCCAACAAG   | pLG1-Puro       |
| pLG1-puro-sgATL2-2                     | GTAGCTGCTGGGAGAACCAG   | TTGGTAGCTGCTGGGAGAACCAGTTTAAGAGC  | TTAGCTCTTAAACTGGTCTCCCAGCAGTACCAACAAG     | pLG1-Puro       |
| pLG1-puro-sgATL2-3                     | GTCGGTACAAGATGGCGGAG   | TTGGTTCGGTACAAGATGGCGGAGTTTAAGAGC | TTAGCTCTTAAACTCCGCATCTGTACCGACCAACAAG     | pLG1-Puro       |
| pLG1-puro-sgATL2-4                     | GAAGGTCGGGGCGGACACGG   | TTGGAAGGTCGGGGCGGACACGGTTTAAGAGC  | TTAGCTCTTAAACCCGTCCGCCCGACCTCCAACAAG      | pLG1-Puro       |
| pLG1-puro-sgATL2-5                     | GAGGCCGCCCTAAGGTCG     | TTGGAGGCCGCCCTAAGGTCGGTTTAAGAGC   | TTAGCTCTTAAACCGACCTTAGGGGGCGCCTCCAACAAG   | pLG1-Puro       |
| pLG1-puro-sgATL3-1                     | GTGGCCCAACGGACAGCCcg   | TTGGTGGCCCAACGGACAGCCcgTTTAAGAGC  | TTAGCTCTTAAACcgGGCTGTCCGTTGGGCCCAACAAG    | pLG1-Puro       |
| pLG1-puro-sgATL3-2                     | GAGCAGGGGTGCAGAGGAGA   | TTGGAGCAGGGGTGCAGAGGAGTTTAAGAGC   | TTAGCTCTTAAACTCTCTCTGCACCCCTGCTCCAACAAG   | pLG1-Puro       |
| pLG1-puro-sgATL3-3                     | GCGGCCCTGGGCCGCCCAG    | TTGGCGGCCCTGGGCCGCCCAGTTTAAGAGC   | TTAGCTCTTAAACTGGGCGGCCCAAGGGCCGCAACAAG    | pLG1-Puro       |
| pLG1-puro-sgATL3-4                     | GCAGAGGAGAGGGACGGGTG   | TTGGCAGAGGAGAGGGACGGGTGTTTAAGAGC  | TTAGCTCTTAAACCCCGTCCCTCTCTCTGCAACAAG      | pLG1-Puro       |
| pLG1-puro-sgATL3-5                     | GGTGCGGGCGGGAACGAACC   | TTGGGTGCGGGCGGGAACGAACCGTTTAAGAGC | TTAGCTCTTAAACGGTTCTCCGCCCGCACCCAACAAG     | pLG1-Puro       |

\* Unless specified otherwise, sgRNA highlighted in bold were used as the default sgRNAs.

Protospacer sequences were obtained from Gilbert et al. 2014.

| shRNA constructs       | Target sequence       | Forward Primer                                                 | Reverse Primer                                                     | Reference                                                                |
|------------------------|-----------------------|----------------------------------------------------------------|--------------------------------------------------------------------|--------------------------------------------------------------------------|
| pLKO.1-puro-shNT       | CCTAAGGTTAAGTCGCCCTCG | CCGGCCTAAGGTTAAGTCGCCCTCGCTCGAGCGA<br>GGGCGACTTAACCTTAGGTTTTTG | AATTCAAAAACCTAAGGTTAAGTCGCCCTCGCTCGAGCGA<br>GGGCGACTTAACCTTAGG     | sequence obtained from Addgene #26701, subcloned into pLKO.1 puro vector |
| pLKO.1-puro-shFAM134B* | GAGGTATCCTGGACTGATAAT | CCGGGAGGTATCCTGGACTGATAATCT<br>CGAGATTATCAGTCCAGGATACCTCTTTTTG | AATTCAAAAAGAGG<br>TATCCTGGACTGATAATCTCGAGATTATCAGTCCAGGATAC<br>CTC | sequence obtained from Khaminets et al. (2015) Nature                    |

**Supp Table 2: Overexpression plasmids**

| <b>cDNA expression constructs</b> | <b>Reference</b>                                                    |
|-----------------------------------|---------------------------------------------------------------------|
| pEF1a-dCas9-HA-BFP-KRAB-NLS       | Addgene #102244                                                     |
| TetOn-mCherry-eGFP-RAMP4          | cDNA of HCT116 cells; NM_014445.3                                   |
| pLenti-X1-Hygro-mCherry-RAMP4     | cDNA of HCT116 cells; NM_014445.3                                   |
| pLenti-X1-Blast-mCherry-RAMP4     | cDNA of HCT116 cells; NM_014445.3                                   |
| pLenti-X1-Blast-mLAMP1-eGFP       | mLAMP1 subcloned from Addgene #55073                                |
| pLenti-X1-Neo-GFP-ATL1            | Derived from Harvard plasmID (HsCD00326984); NM_015915.4            |
| pLenti-X1-Neo-GFP-ATL1-ΔTM        | Derived from pLenti-X1-Neo-GFP-ATL1; aa 1-449 only                  |
| pLenti-X1-Neo-GFP-ATL2            | cDNA of HCT116 cells, NM_001135673.3                                |
| pLenti-X1-Neo-GFP-ATL2-ΔTM        | Derived from pLenti-X1-Neo-GFP-ATL2; aa 1-476 only                  |
| pLenti-X1-Neo-GFP-ATL2-Δcterm     | Derived from pLenti-X1-Neo-GFP-ATL2; aa 1-523 only                  |
| pLenti-X1-Neo-GFP-ATL2-R244Q      | Derived from pLenti-X1-Neo-GFP-ATL2; with Q to Q mutation at aa 244 |
| pLenti-X1-Neo-GFP-ATL3            | cDNA of HCT116 cells, NM_001290048.1                                |
| pLenti-X1-Neo-GFP-ATL3-ΔTM        | Derived from pLenti-X1-Neo-GFP-ATL3; aa 1- 427 only                 |
| pLenti-X1-Neo-HA-ATL1             | Derived from Harvard plasmID (HsCD00326984); NM_015915.4            |
| pLenti-X1-Neo-HA-ATL1-ΔTM         | Derived from pLenti-X1-Neo-HA-ATL1; AA 1-449 only                   |
| pLenti-X1-Neo-HA-ATL2             | cDNA of HCT116 cells, NM_001135673.3                                |
| pLenti-X1-Neo-HA-ATL2-ΔTM         | Derived from pLenti-X1-Neo-HA-ATL2; aa 1-476 only                   |
| pLenti-X1-Neo-HA-ATL2-Δcterm      | Derived from pLenti-X1-Neo-HA-ATL2; aa 1-523 only                   |
| pLenti-X1-Neo-HA-ATL2-R244Q       | Derived from pLenti-X1-Neo-HA-ATL2; with R to Q mutation at aa 244  |
| pLenti-X1-Neo-HA-ATL2-K107A       | Derived from pLenti-X1-Neo-HA-ATL3; with K to A mutation at aa 107  |
| pLenti-X1-Neo-HA-ATL3             | cDNA of HCT116 cells, NM_001290048.1                                |
| pLenti-X1-Neo-HA-ATL3-ΔTM         | Derived from pLenti-X1-Neo-HA-ATL3; aa 1-427 only                   |
| pLenti-X1-Neo-BFP-ATL2            | cDNA of HCT116 cells, NM_001135673.3                                |
| pLenti-X1-Neo-BFP-ATL2-ΔTM        | Derived from pLenti-X1-Neo-BFP-ATL2; aa 1-476 only                  |
| pLenti-X1-Neo-BFP-ATL2-Δcterm     | Derived from pLenti-X1-Neo-BFP-ATL2; aa 1-523 only                  |
| pLenti-X1-Neo-BFP-ATL2-R244Q      | Derived from pLenti-X1-Neo-BFP-ATL2; with R to Q mutation at aa 244 |
| pLenti-X1-Neo-GFP-FAM134B         | cDNA of HCT116 cells, NM_001034850.2                                |
| pLenti-X1-Neo-HA-FAM134B          | cDNA of HCT116 cells, NM_001034850.2                                |
| pLenti-X1-Neo-GFP-FAM134B-LIRmut  | Derived from pLenti-X1-Neo-GFP-FAM134B; DDFELL to DDAEAL aa 453-458 |
| pLenti-X1-Neo-HA-FAM134B-LIRmut   | Derived from pLenti-X1-Neo-HA-FAM134B; DDFELL to DDAEAL aa 453-458  |



**Supp Table 3: siRNA sequences**

| <b>siRNA</b> | <b>target sequence</b>                   | <b>Reference</b>                       |
|--------------|------------------------------------------|----------------------------------------|
| siNT         | Dharmacon ON-TARGETplus non-targeting #1 | Cat No.: D-001810-01-05                |
| siULK1       | Dharmacon siGenome Smartpool             | Cat No.: M-005049-00-0005              |
| siATL2       | GGAGCUAUCCUUAUGAACAUUCAUA                | Rismanchi et al. (2008) Hum Mol Genet. |
| siATL3       | GGUUAGAGAUUGGAGUUUCCCUUUAU               | Rismanchi et al. (2008) Hum Mol Genet. |
| siFAM134B    | AGGUAUCCUGGACUGAUA AUG                   | Rivera-Monroy et al. (2016) Sci Rep.   |

**Supp Table 4: qRT-PCR primers**

| Target         | Primer  | Sequence                |
|----------------|---------|-------------------------|
| ULK1           | Forward | GTCGCCGTCAAGTGCATTAACA  |
|                | Reverse | CGTACAGGGCCACGATGTTTTTC |
| ATL1           | Forward | CAGCACCTCCAGCTTTTCACTG  |
|                | Reverse | CACCACCATCGGCTCCATATGA  |
| ATL2           | Forward | TCCTTTTGCCACATCCTGGTCT  |
|                | Reverse | GCAAGCAGCAATGGAACCAGAT  |
| ATL3           | Forward | AAGATCTGCCTCACCCAAGTC   |
|                | Reverse | CTCCCCACAAACCTCTTCCAT   |
| $\beta$ -actin | Forward | GGGTCAGAAGGATTCCTATG    |
|                | Reverse | GGTCTCAAACATGATCTGGG    |

**Supp Table 5: Primary and secondary antibodies for western blotting and immunofluorescence**

| Target        | Company             | Cat. No.   | Species | WB Dilution | IF Dilution |
|---------------|---------------------|------------|---------|-------------|-------------|
| ATL1          | Cell Signaling      | #12728     | rabbit  | 1 in 1000   |             |
| ATL2          | Novus Biologicals   | NBP1-78733 | rabbit  | 1 in 1000   |             |
| ATL2          | Santa Cruz          | sc-109213  | goat    | 1 in 1000   |             |
| ATL3          | Bethyl Laboratories | A303-313A  | rabbit  | 1 in 1000   |             |
| CANX          | Cell Signaling      | #2679      | rabbit  | 1 in 2000   | 1 in 250    |
| CANX          | Santa Cruz          | sc-46669   | mouse   | 1 in 1000   | 1 in 250    |
| CLIMP63/CKAP4 | Bethyl Laboratories | A302-257A  | rabbit  | 1 in 2000   |             |
| FAM134B       | Abcam               | ab151755   | rabbit  | 1 in 1000   |             |
| GAPDH         | Cell Signaling      | #97166     | mouse   | 1 in 2000   |             |
| GFP           | Abcam               | ab6556     | rabbit  | 1 in 2000   |             |
| GFP           | Santa Cruz          | sc-9996    | mouse   | 1 in 2000   |             |
| HA epitope    | Cell Signaling      | #3724      | rabbit  | 1 in 2000   |             |
| LAMP2         | Santa Cruz          | sc-18822   | mouse   | 1 in 1000   | 1 in 250    |
| LC3           | Nanotools           | 0231-100   | mouse   | 1 in 200    | 1 in 200    |
| LC3B          | Novus Biologicals   | NB100-2220 | rabbit  | 1 in 1000   | 1 in 250    |
| mCherry       | Abcam               | ab183628   | rabbit  | 1 in 2000   |             |
| p62           | Santa Cruz          | sc-28359   | mouse   | 1 in 1000   |             |
| PDI           | Santa Cruz          | sc-20132   | rabbit  | 1 in 2000   |             |
| RAMP4         | Abcam               | ab184571   | rabbit  | 1 in 1000   |             |
| REEP5         | ProteinTech         | 14643-1-AP | rabbit  | 1 in 1000   |             |
| RTN3          | Novus Biologicals   | A302-860A  | rabbit  | 1 in 500    |             |
| ULK1          | Cell Signaling      | #8054      | rabbit  | 1 in 1000   |             |

| Secondary antibodies for Western | Catalogue No. | Company    | Dilution    | Application                |
|----------------------------------|---------------|------------|-------------|----------------------------|
| Donkey anti-mouse IRDye 680CW    | 926-32222     | Li-Cor     | 1 in 10,000 | near-infrared fluorescence |
| Donkey anti-mouse IRDye 800CW    | 926-32212     | Li-Cor     | 1 in 10,000 | near-infrared fluorescence |
| Donkey anti-rabbit IRDye 680CW   | 926-32223     | Li-Cor     | 1 in 10,000 | near-infrared fluorescence |
| Donkey anti-rabbit IRDye 800CW   | 926-32213     | Li-Cor     | 1 in 10,000 | near-infrared fluorescence |
| Donkey anti-goat IgG HRP         | sc-2020       | Santa Cruz | 1 in 5000   | HRP chemiluminescence      |

| Secondary Antibody for Immunofluorescence | Catalogue No. | Company    | Dilution |
|-------------------------------------------|---------------|------------|----------|
| Donkey anti-mouse AF350                   | A10035        | Invitrogen | 1 in 200 |
| Donkey anti-mouse AF488                   | A21202        | Invitrogen | 1 in 200 |
| Donkey anti-mouse AF594                   | A21203        | Invitrogen | 1 in 500 |
| Donkey anti-rabbit AF350                  | A10039        | Invitrogen | 1 in 200 |
| Donkey anti-rabbit AF488                  | A21206        | Invitrogen | 1 in 500 |
| Donkey anti-rabbit AF594                  | A21207        | Invitrogen | 1 in 500 |
